# Supplementary material
Source: PubMed Central journal article supplement (PMC4524831)
Supplement: 12687_2015_236_MOESM1_ESM.pdf [file 12687_2015_236_MOESM1_ESM.pdf]

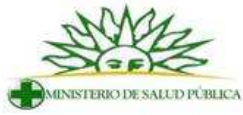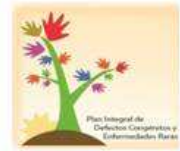

## Encuesta sobre Enfermedades Raras en Uruguay

### 1. Cual es la definición de enfermedad rara?

- Afecta 1 de cada 500 personas.
- Afecta 1 de cada 1000 personas.
- Afecta 1 de cada 2000 personas.
- Afecta 1 de cada 10000 personas.
- Afecta 1 de cada 100000 personas.

### 2. Como le parece a Ud. que es la situación del grupo de enfermedades raras en la sociedad uruguaya? (Puede marcar mas de una opción)

- Existe conocimiento en relación a estas patologías por parte de los profesionales de la salud
- Existe conocimiento en relación a estas patologías por parte de la población
- Existe desinformación en relación a estas patologías por parte de los profesionales de la salud
- Existe desinformación en relación a estas patologías por parte de la población
- Existen acciones del sistema de salud en relación a estas patologías

### 3. De una manera general como le parece a usted que estamos a en relación a las Enfermedades Raras en los siguientes aspectos?

|                                                                      | Muy deficiente | Deficiente | Regular | Bueno | Muy bueno |
|----------------------------------------------------------------------|----------------|------------|---------|-------|-----------|
| Asistencia médica                                                    |                |            |         |       |           |
| Conocimiento médico                                                  |                |            |         |       |           |
| Inserción de las personas afectadas en la sociedad a nivel educativo |                |            |         |       |           |
| Inserción de las personas afectadas en la sociedad a nivel laboral   |                |            |         |       |           |
| Legislaciones                                                        |                |            |         |       |           |

### 4. Sabia usted que la mayoría de las patologías diagnosticadas a través de la Pesquisa Neonatal y del Lactante son por definición Enfermedades Raras?

- Si
- No

### 5. Sabe que desde Octubre del 2013 existe una nueva Legislación al respecto?

- Si
- No

### 6. La actual Pesquisa Neonatal y del Lactante en Uruguay contiene:

- a) Fortalecimiento del examen físico sistemático del recién nacido: Detección de malformaciones congénitas menores o mayores, internas o externas.
- b) Detección de enfermedades a través de una gota de sangre: (Hipotiroidismo Congénito, Fenilcetonuria, Hiperplasia Suprarrenal Congénita, Fibrosis Quística, Déficit de Acetil CoA Deshidrogenasa de Cadena Media-MCADD).
- c) Detección de Hipoacusia Congénita a través del uso de emisiones otacústicas.
- d) Detección de Displasia Congénita de Cadera en lactantes a través de ecografía.

Le parece que con este enfoque se podrán prevenir más y mejor las enfermedades congénitas?

Si

No

No sabe

7. Porque le parece a usted que ese grupo de patologías fue seleccionada? (Puede marcar mas de una opción)

En base a la epidemiología (frecuencia de la enfermedad)

En base a la disponibilidad de realizar los test, de sospecha de la entidad y de confirmación diagnóstica

En base a la existencia de tratamiento

Por la existencia de grupos de presión

Otras causas (especifique)

8. Que le parece que es necesario además de contar con el Test Diagnóstico confirmatorio específico? (Puede marcar mas de una opción)

Garantizar el tratamiento de por vida

Garantizar el seguimiento

Garantizar el asesoramiento genético

Garantizar la curación

Outro (especifique)

9. Cual le parece que podría ser su rol dentro de su asociación o institución en relación al abordaje de esta problemática? (Puede marcar mas de una opción)

De difusión

De sensibilización

De educación

Ninguno de ellos

Otro (especifique)

10. Para su asociación o colectivo como clasificaría a su propia enfermedad en relación a los aspectos ya mencionados para incluirla en la pesquisa neonatal del Lactante en Uruguay?

Posible a corto plazo

Posible a mediano plazo

Inviabile del punto de vista médico por el momento

Especifique nombre de la patología

Concluído
